# Supplementary material for: Rapid centralised randomisation in emergency setting trials using a smartphone
Source: PubMed Central journal article supplement (PMC9352638; doi:10.1007/s00431-022-04475-y), 2022-05-17

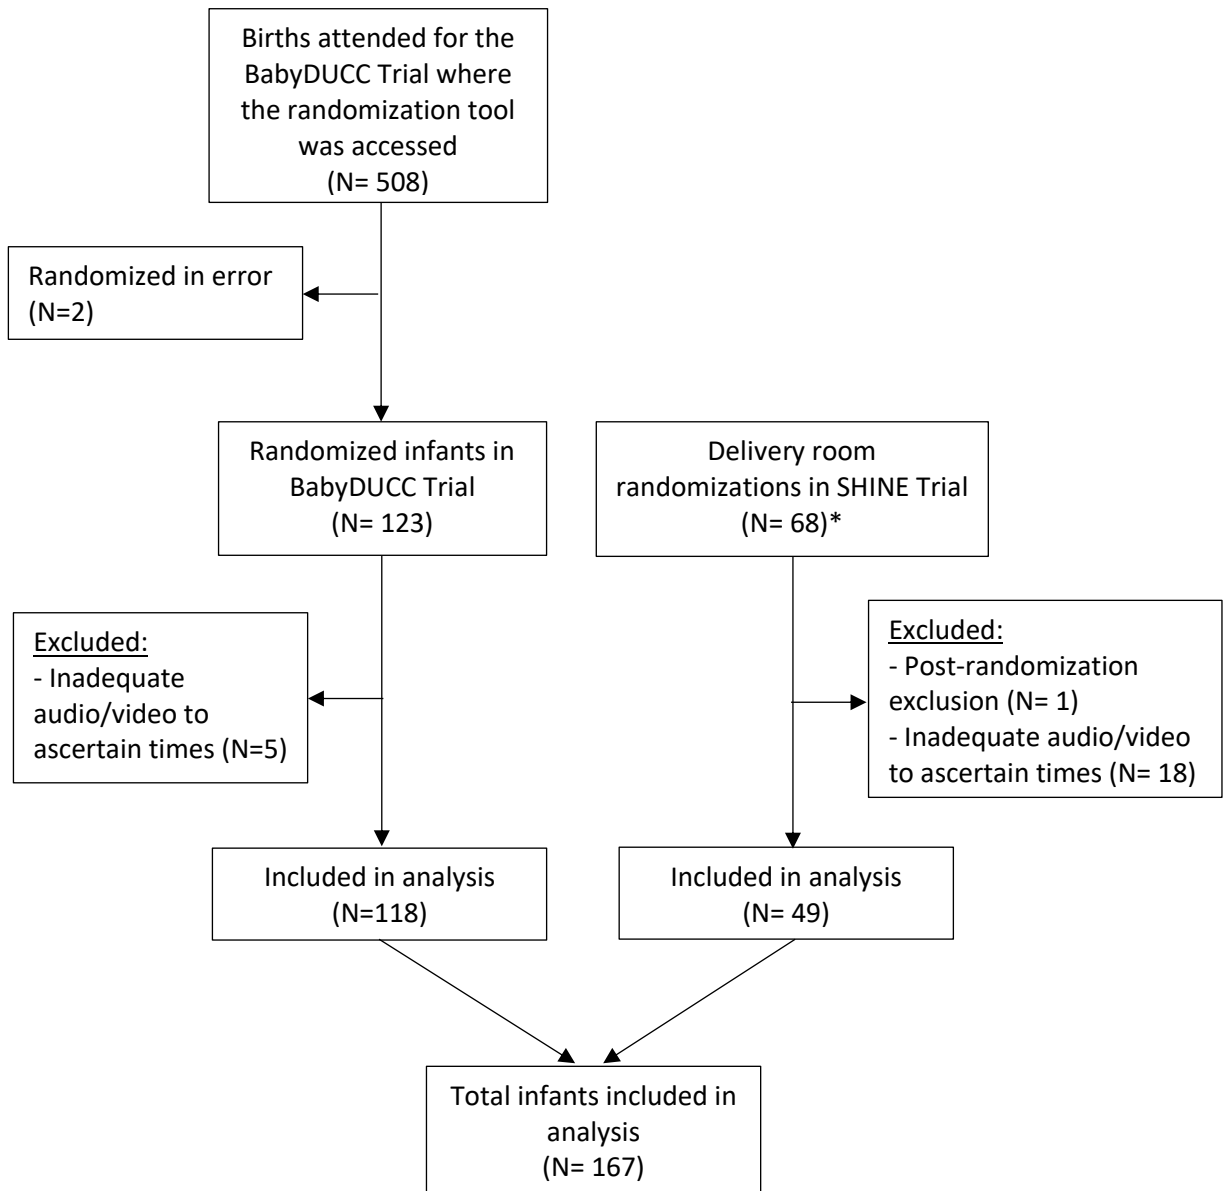

Supplement: 431_2022_4475_MOESM3_ESM.pdf [file 431_2022_4475_MOESM3_ESM.pdf]
